# Supplementary material for: Phosphorus poisoning and regeneration of the Cu-LTA catalyst for the selective catalytic reduction of NOx with NH3
Source: Royal Society of Chemistry journal article supplement (doi:10.1039/d4cy00004h), 2024-01-01
Supplement: d4cy00004h1.pdf [file d4cy00004h1.pdf]

*Electronic Supplementary Information*

**Phosphorus poisoning and regeneration of Cu-LTA catalyst for the  
selective catalytic reduction of NO<sub>x</sub> with NH<sub>3</sub>**

Xueyang Hu <sup>a,b,c</sup>, Jinhan Lin <sup>a,b\*</sup>, Xuechao Tan <sup>d</sup>, Yingjie Li <sup>a,b,c</sup>, Xiaofeng Liu <sup>a,c</sup>, Yan Zhang <sup>a,b</sup>, Wenpo

Shan <sup>a,b\*</sup>

<sup>a</sup> Center for Excellence in Regional Atmospheric Environment and Key Laboratory of Urban Pollutant Conversion, Institute of Urban Environment, Chinese Academy of Science, Xiamen 361021, China

<sup>b</sup> Zhejiang Key Laboratory of Urban Environmental Processes and Pollution Control, Ningbo Urban Environment Observation and Research Station, Institute of Urban Environment, Chinese Academy of Sciences, Ningbo 315800, China

<sup>c</sup> University of Chinese Academy of Sciences, Beijing 100049, China

<sup>d</sup> Center for Ordered Nanoporous Materials Synthesis, Division of Environmental Science and Engineering, POSTECH, Pohang, 37673, South Korea

\*Corresponding author: [jhlin@iue.ac.cn](mailto:jhlin@iue.ac.cn) (Jinhan Lin); [wpschan@iue.ac.cn](mailto:wpschan@iue.ac.cn) (Wenpo Shan)

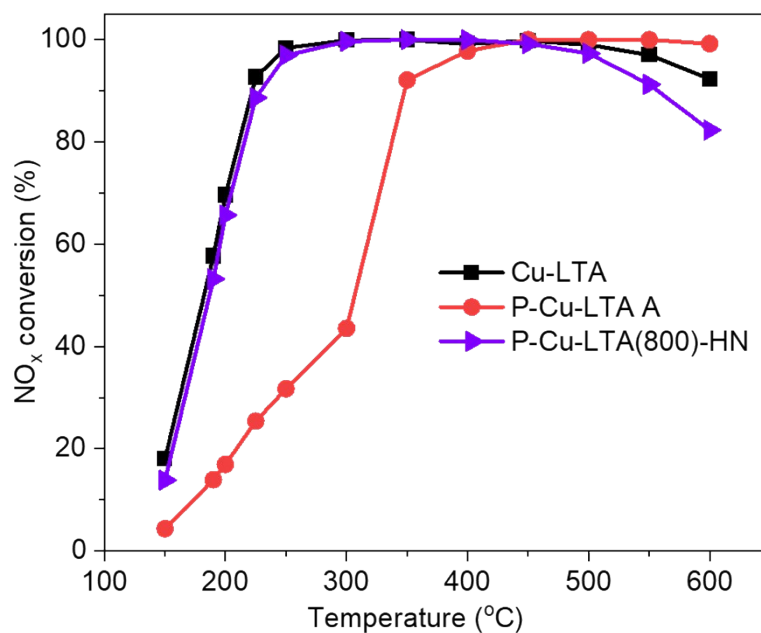

**Fig. S1.** NO<sub>x</sub> conversion of fresh, phosphorus-poisoned, and regenerated Cu-LTA catalysts.

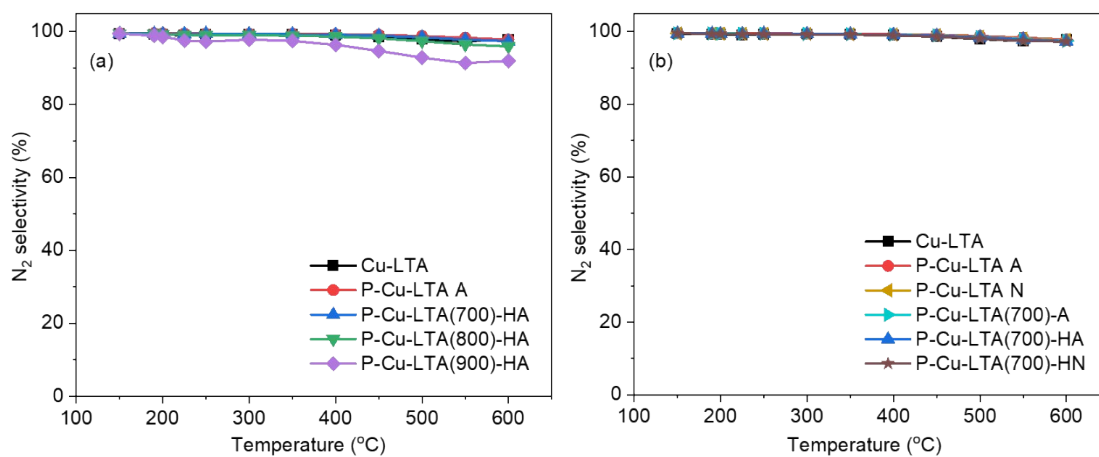

**Fig. S2.** N<sub>2</sub> selectivity as a function of temperature over (a) fresh, phosphorus-poisoned, and regenerated Cu-LTA catalysts at different hydrothermal temperatures and (b) fresh, phosphorus-poisoned, and regenerated Cu-LTA catalysts under different atmospheres. The feed gas contained 500 ppm NH<sub>3</sub>, 500 ppm NO, 5% O<sub>2</sub>, 10% H<sub>2</sub>O, and N<sub>2</sub> balance, at a GHSV of 100,000 h<sup>-1</sup>.

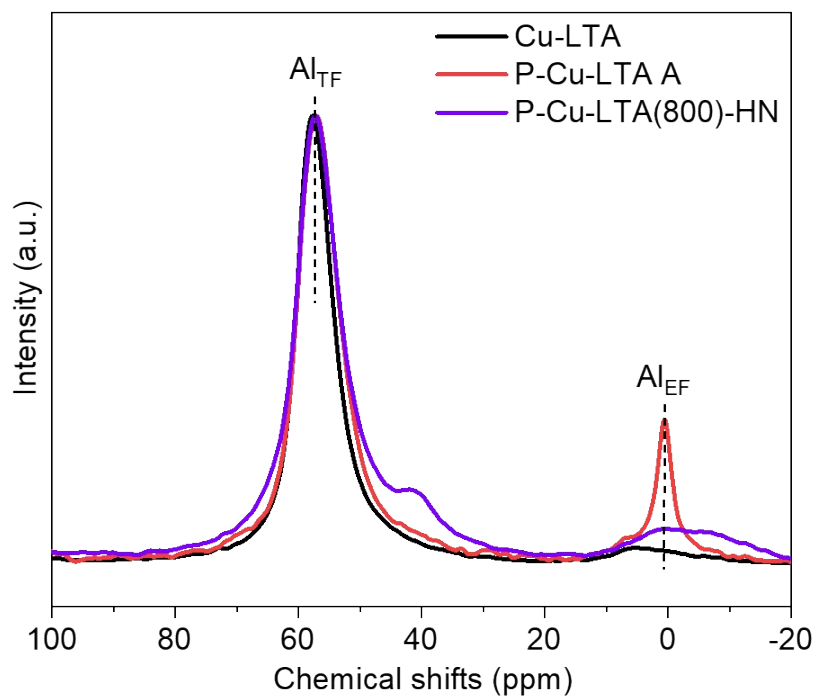

**Fig. S3.**  $^{27}\text{Al}$  solid-state NMR spectra of fresh, phosphorus-poisoned, and regenerated Cu-LTA catalysts.
